# Supplementary material for: The hydrocephalus inducing gene product, Hydin, positions axonemal central pair microtubules
Source: PubMed Central journal article supplement (PMC2048497; doi:10.1186/1741-7007-5-33), 2007-08-07

29-13 parental cell line

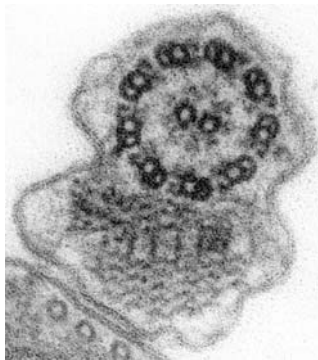

PACRGA RNAi-induced

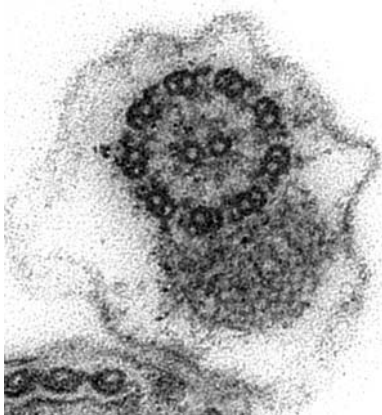

PACRGB RNAi-induced

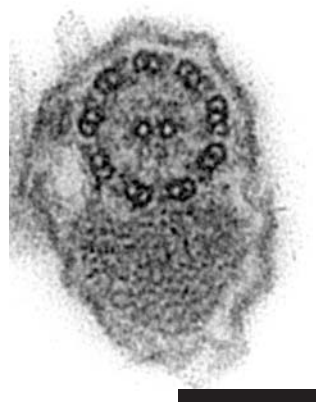

Supplement: 1741-7007-5-33-S1.pdf [file 1741-7007-5-33-S1.pdf]
